# Supplementary material for: Adsorption of Phosphates onto Mg/Al-Oxide/Hydroxide/Sulfate-Impregnated Douglas Fir Biochar
Source: MDPI journal article supplement (doi:10.3390/pr11010111), 2022-12-31
Supplement: s1 [file s1]

*Supporting material*

# **Adsorption of phosphates onto Mg/Al-oxide/hydroxide/sulfate impregnated Douglas fir biochar**

**Chanaka M Navarathna<sup>1,\*</sup>, Jaylen E Pennisson<sup>1</sup>, Narada Wickramasinghe<sup>1</sup>, Claudia Reid<sup>1</sup>, Charles Dotse<sup>1</sup>, Mehdi Erfani Jazi<sup>1</sup>, Prashan Rodrigo<sup>1</sup>, Xuefeng Zhang<sup>2</sup>, Erin Farmer<sup>1</sup>, Colton Watson<sup>1</sup>, Daniel O Craig<sup>1</sup>, Arissa Ramirez<sup>1</sup>, Michael Walker<sup>1</sup>, Sunith Madduri<sup>2</sup>, Dinesh Mohan<sup>3</sup>, and Todd E Mlsna<sup>1,\*</sup>**

<sup>1</sup> Department of Chemistry, Mississippi State University, Starkville, MS 39762, USA

<sup>2</sup> Department of Sustainable Bioproducts, Mississippi State University, Starkville, MS 39762, USA

<sup>3</sup> School of Environmental Sciences, Jawaharlal Nehru University, New Delhi 110067, India

\* Correspondence: cmn280@msstate.edu (C.M.N.); tmlsna@chemistry.msstate.edu (T.E.M.); Tel.: +1-6626941345 (C.M.N.); +1-6623256744 (T.E.M.)

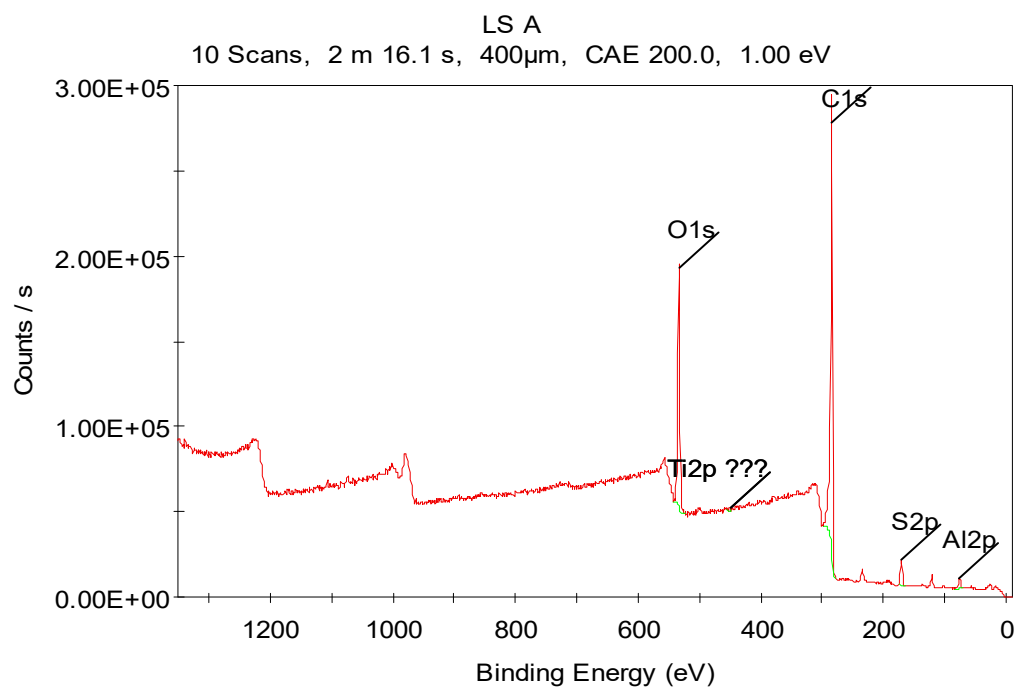

Figure S1: LR-XPS data for P-laden BC

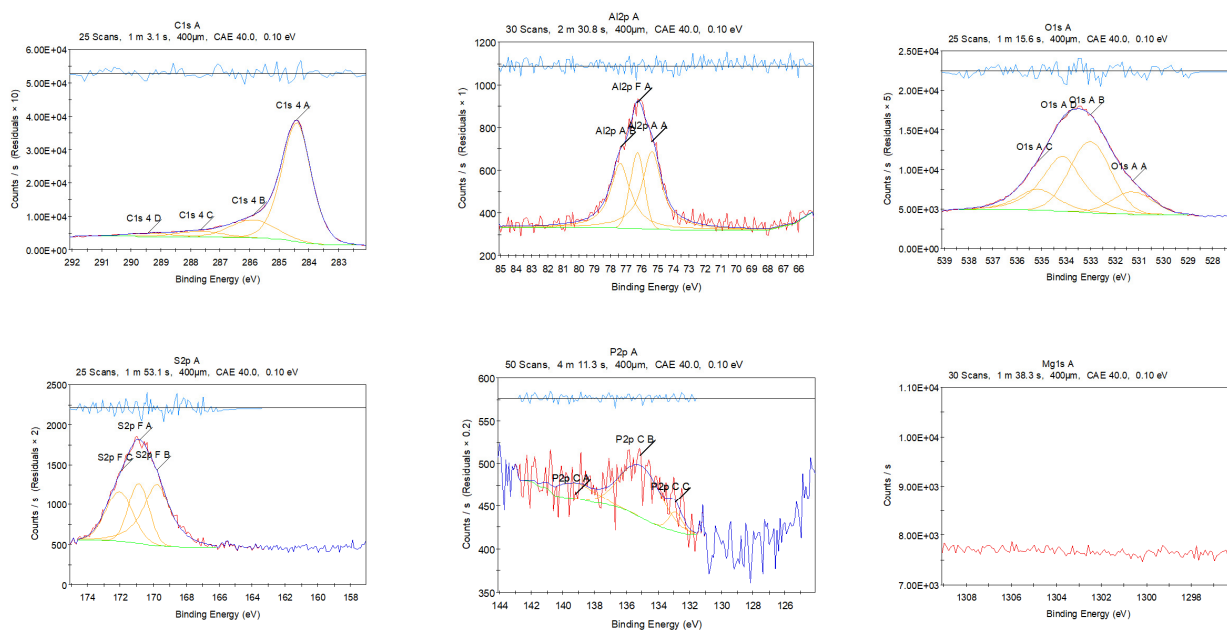

Figure S2: HR-XPS data for P-laden BC
